# Supplementary material for: EBT anchored SiO23-D microarray: a simultaneous entrapper of two different metal centers at high and low oxidation states using its highest occupied and lowest unoccupied molecular orbital, respectively
Source: Royal Society of Chemistry journal article supplement (doi:10.1039/c5ra07103h), 2015-01-01
Supplement: c5ra07103h1.pdf [file c5ra07103h1.pdf]

## SUPPORTING INFORMATION

### *EBT anchored SiO<sub>2</sub> 3-D microarray: A simultaneous entrapper of two different metal centers at High and Low oxidation states using its respective highest occupied and lowest unoccupied molecular orbital*

Bhavya Srivastava, Milan K. Barman, Mousumi Chatterjee and Bhabatosh Mandal\*

Analytical Laboratory, Department of Chemistry,

Visva-Bharati, Santiniketan 731235, India

\* Author to whom all correspondence should be addressed: E-mail: bhabatosh\_mandal@yahoo.co.in

Mobile No: + (91)9474738517

*Schemes:*

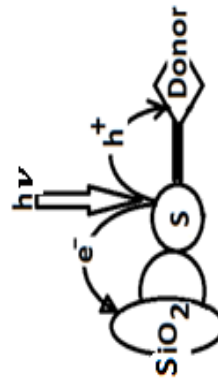

Scheme S1

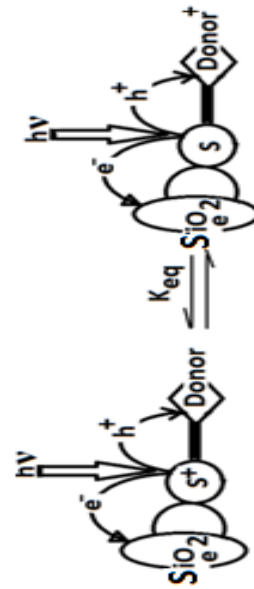

Scheme S2

**File SI:**

***The specific surface area was calculated by the Brunauer-Emmett-Teller (BET) method using the adsorption branch.***

BET (Specific Surface Area) Result: (t-Plot external surface area: 339.8254 m<sup>2</sup> g<sup>-1</sup>; Single point surface area at P / P<sub>0</sub> of 0.300006229: 317.8206 m<sup>2</sup> g<sup>-1</sup>; BJH adsorption cumulative surface area of pores between 17.0 A - 3000.0 A diameter: 324.381 m<sup>2</sup> g<sup>-1</sup> ; BJH desorption cumulative surface area of pores between 17.0 A - 3000.0 A diameter: 364.511 m<sup>2</sup> g<sup>-1</sup> and pore volumes ( single point adsorption total pore volume of pores less than 1014.164 A diameter at P/P<sub>0</sub> of 0.980530216: 0.388974 cm<sup>3</sup> g<sup>-1</sup>; t-Plot micro pore volume: -0.007751 cm<sup>3</sup> g<sup>-1</sup>; BJH adsorption cumulative volume of pores between 17.0 A - 3000.0 A diameter: 0.374689 cm<sup>3</sup> g<sup>-1</sup>; BJH desorption cumulative volume of pores between 17.0 A - 3000.0 A diameter: 0.418756 cm<sup>3</sup> g<sup>-1</sup>) of the dry exchanger were obtained by BET analysis (Fig. 3c) and emphasizes the analytical application of the synthesized material. It also gives the pore sizes: 47.0107 A and 46.204 A respectively for the adsorption average pore width (4V/A by BET) and BJH adsorption average pore diameter (4V/A)).

ASP 2020 10.03 H Unit 1 Serial # 539 Page 1

 Sample: EBT-D.O.S.Bag  
 Operator: BOHTASHAWIK SINGH  
 Submitter: DMSRDE HARG KANPUR P-60  
 File: C:\02020\DDAT-1000-340\SMP

 Started: 7/10/2013 3:45:57PM  
 Completed: 7/10/2013 7:49:01PM  
 Report Time: 7/10/2013 1:54:17PM  
 Sample Mass: 0.0710 g  
 Cool Flow Space: 82.1653 cm<sup>3</sup>  
 Low Pressure Dose: None  
 Analysis Adsorptive: N2  
 Analysis Bath Temp.: -156.850 °C  
 Thermal Correction: No  
 Warm Flow Space: 25.4410 cm<sup>3</sup> Measured  
 Equilibration Interval: 5 s  
 Automatic Degas: Yes

Single point surface area at P/Po = 0.300006229: 317.8206 m<sup>2</sup>/g

BET Surface Area: 330.9668 m<sup>2</sup>/g

t-Plot External Surface Area: 339.8254 m<sup>2</sup>/g

BJH Adsorption cumulative surface area of pores between 17.000 Å and 3000.000 Å diameter: 324.391 m<sup>2</sup>/g

BJH Desorption cumulative surface area of pores between 17.000 Å and 3000.000 Å diameter: 364.5110 m<sup>2</sup>/g

Single point adsorption total pore volume of pores less than 1014.164 Å diameter at P/Po = 0.980530216: 0.388974 cm<sup>3</sup>/g

t-Plot micropore volume: 0.007751 cm<sup>3</sup>/g

BJH Adsorption cumulative volume of pores between 17.000 Å and 3000.000 Å diameter: 0.374689 cm<sup>3</sup>/g

BJH Desorption cumulative volume of pores between 17.000 Å and 3000.000 Å diameter: 0.418756 cm<sup>3</sup>/g

Pore Size

Adsorption average pore width (4V/A by BET): 47.0107 Å

BJH Adsorption average pore diameter (4V/A): 46.204 Å

### Scheme S3: Synthesis of the extractor: Chemical structure of Resin (FSG-EBT)

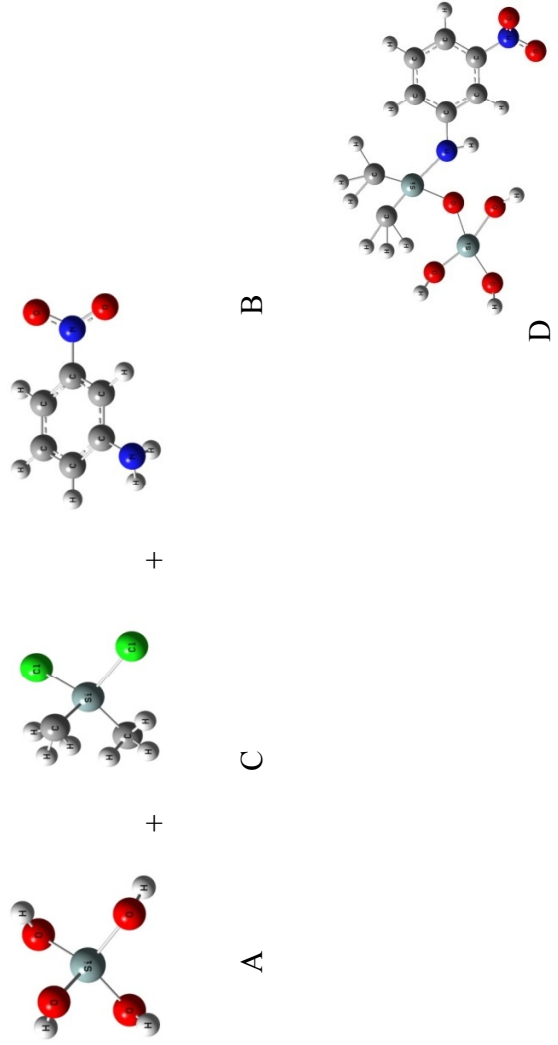

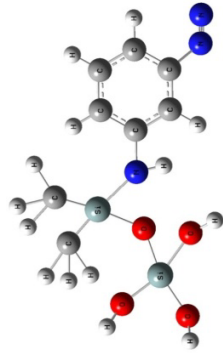

E (diazo-compound)

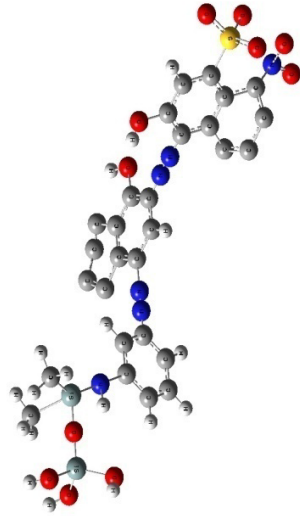

F (Resin: Diazo-EBT complex)

Scheme-S3 (synthesis of the resin)

**Table S1: Selected experimental FT-IR and RAMAN bands of extractor (FSG-EBT) and B3LYP/6-STO-3G (d) calculated vibration modes with considerable Raman intensity.**

| <b>RAMAN (Exp.) (cm<sup>-1</sup>)</b>                                                         | <b>B3LYP (DFT) (cm<sup>-1</sup>)</b>                                                          | <b>RAMAN / FTIR [50,51]</b>                                                                        | <b>Band Assignment</b>                                           |
|-----------------------------------------------------------------------------------------------|-----------------------------------------------------------------------------------------------|----------------------------------------------------------------------------------------------------|------------------------------------------------------------------|
| <b>FT-IR(Exp.) (cm<sup>-1</sup>)</b>                                                          | <b>(Reported) (cm<sup>-1</sup>)</b>                                                           |                                                                                                    |                                                                  |
| (1065, 1088) <sup>a+</sup> (1203) <sup>b-</sup>                                               | (781, 1070) <sup>a+</sup> (1230) <sup>b-</sup>                                                | (1075) <sup>a+</sup> (1201,1232) <sup>b-</sup>                                                     | Si-O-Si linkage <sup>[10]</sup>                                  |
| (420,710,820) <sup>c</sup>                                                                    | (450,705,840) <sup>c</sup>                                                                    | (414,470,764,810) <sup>c</sup>                                                                     |                                                                  |
| (900-1203) <sup>b+</sup> (1100) <sup>b-</sup>                                                 | (850-1100) <sup>b+</sup> (1120) <sup>b-</sup>                                                 | (950-1200) <sup>b+</sup> (1080-1100) <sup>b-</sup>                                                 | Si-O <sup>[11a]</sup>                                            |
| (2192) <sup>a+</sup> (2270) <sup>b-</sup>                                                     | (2000) <sup>a+</sup> (2150) <sup>b-</sup>                                                     | (2187) <sup>a+</sup> (2170) <sup>b-</sup>                                                          | Si-H <sup>[11b]</sup>                                            |
| (1518, 1595) <sup>a+</sup> (1320) <sup>b-</sup>                                               | (1500,1600) <sup>a-</sup> (1570) <sup>b-</sup>                                                | (1505,1594) <sup>a+</sup> (1614) <sup>a-</sup>                                                     | -NO <sub>2</sub>                                                 |
| (1422, 1559) <sup>b+</sup>                                                                    | (1450) <sup>b+</sup>                                                                          | (1576) <sup>b-</sup> (1565, 1617) <sup>b+</sup>                                                    |                                                                  |
| (1136) <sup>a+</sup> (1107,1559) <sup>b+</sup>                                                | (1130) <sup>a+</sup> (1100,1550) <sup>b-</sup>                                                | (1130) <sup>a+</sup> (1144,1540) <sup>b+</sup>                                                     | -S=O & -OH in -SO <sub>3</sub> H (Silanol group)                 |
| (1120) <sup>b-</sup>                                                                          | (1125) <sup>b+</sup>                                                                          | (1145) <sup>b-</sup>                                                                               |                                                                  |
| (1281-1372) <sup>a+</sup> (1516-1570) <sup>a-</sup> (1559) <sup>b-</sup> (1320) <sup>b+</sup> | (1281-1372) <sup>a+</sup> (1500-1580) <sup>a-</sup> (1559) <sup>b-</sup> (1350) <sup>b+</sup> | (1293-1374) <sup>a+</sup> (1505-1594) <sup>a-</sup> (1501-1617) <sup>b-</sup> (1397) <sup>b+</sup> | -C-C-stretching of pyridine ring                                 |
| (1518) <sup>a+</sup> (951,2031) <sup>b-</sup>                                                 | (1500) <sup>a+</sup> (800,2010) <sup>b+</sup>                                                 | (1505-1558) <sup>a+</sup>                                                                          | -N=N-stretching <sup>[12]</sup> , amidst (i) EBT,EBT- diazotized |
| (1320) <sup>c</sup>                                                                           | (1350) <sup>c</sup>                                                                           | (884,2089,2123) <sup>b-</sup> (1335) <sup>c</sup>                                                  | FSG                                                              |
| (1450-1480) <sup>a+</sup> (1200) <sup>b-</sup>                                                | (1400, 1435) <sup>a+</sup> (1250) <sup>b-</sup>                                               | (1447-1470) <sup>a+</sup> (1274) <sup>b-</sup>                                                     | φ C-H stretching of pyridine ring.                               |

|                                                    |                                                    |                                                                   |                                                                 |
|----------------------------------------------------|----------------------------------------------------|-------------------------------------------------------------------|-----------------------------------------------------------------|
| (1136) <sup>a+</sup> (1050,1107) <sup>b-</sup>     | (1160) <sup>a+</sup> (1050;1120) <sup>b-</sup>     | (1144) <sup>a+</sup> (1049,1145) <sup>b-</sup> (803) <sup>c</sup> | O-H in SO <sub>3</sub> H                                        |
| (807) <sup>c</sup>                                 | (830) <sup>c</sup>                                 |                                                                   |                                                                 |
| (3300) <sup>a+</sup> (3525) <sup>b--</sup>         | (3400) <sup>a+</sup> (3540.51) <sup>b--</sup>      | (3350) <sup>a+</sup> (3100-3500) <sup>b-</sup>                    | N-H in (Si-N(H)-C( $\phi$ -ring))                               |
| (1120) <sup>c</sup>                                | (1170) <sup>c</sup>                                | (1175) <sup>c</sup>                                               |                                                                 |
| (1137-1559) <sup>a+</sup> (1050-1559) <sup>c</sup> | (1110-1570) <sup>a+</sup> (1049-1650) <sup>c</sup> | (1144-1558) <sup>a+</sup> (1049-1617) <sup>c</sup>                | Phenolic-OH of naphthol                                         |
| ((1137-1559) <sup>a+</sup>                         | (1100-1570) <sup>a+</sup>                          | (1144-1558) <sup>a+</sup> (803, 1049-                             | O-H in Si(OH) <sub>3</sub>                                      |
| (816,1150-1559) <sup>b-</sup>                      | (840,1100-1595) <sup>b-</sup>                      | 1617) <sup>b-</sup>                                               |                                                                 |
| (1050,1233,1291,1336) <sup>a+</sup>                | (1054,1245,1360) <sup>a+</sup>                     | (1047, 1240, 1293, 1335) <sup>a+</sup>                            | C-N linkage <sup>[13]</sup>                                     |
| (2350) <sup>b-</sup>                               | (2200) <sup>b-</sup>                               | (2200) <sup>b-</sup>                                              |                                                                 |
| (858-1203) <sup>b-</sup>                           | (850-1180) <sup>b-</sup>                           | (862-1170) <sup>b-</sup>                                          | Si-N stretching <sup>[14]</sup>                                 |
| (978,1012-1614) <sup>a+</sup>                      | (1017-1620) <sup>a+</sup> (3600) <sup>b+</sup>     | (973,1007-1614) <sup>a+</sup> (3655-                              | C-H of aliphatic CH <sub>3</sub> attached to Si <sup>[15]</sup> |
| (3697) <sup>b-</sup> (951-1632) <sup>c</sup>       | (1050-1559) <sup>c</sup>                           | 3699) <sup>b-</sup> (1047-1594) <sup>c</sup>                      |                                                                 |

a = Raman; b = FT-IR; c = bending; -ve = sym. Stretching; +ve = assym. Stretching;  $\phi$  = aromatic

Figure S1: Experimental Raman spectra (Experimental Raman Spectra (upper curve corresponds to the Th-loaded exchanger

while lower curve corresponds to the unloaded exchanger))

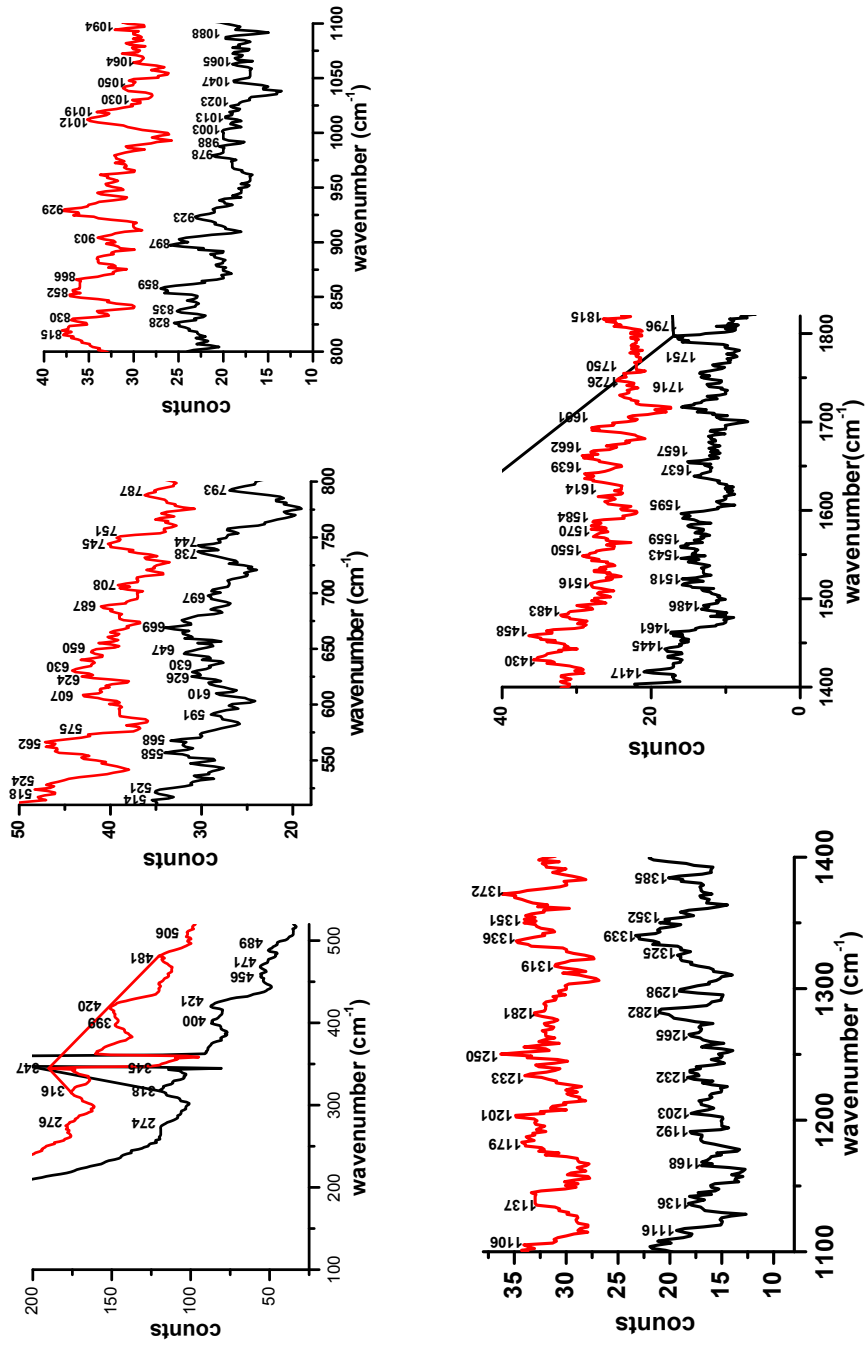

**Figure S2: DFT calculated NMR spectra of  $^1\text{H}$  (a) and  $^{13}\text{C}$  NMR (b) of a model compound (c) comprising one tetrahedral edge of FSG-EBT used in DFT calculation for NMR spectra.**

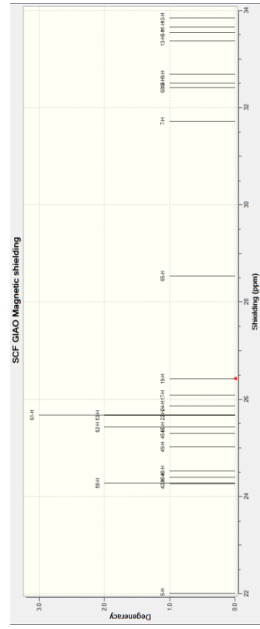

(a)

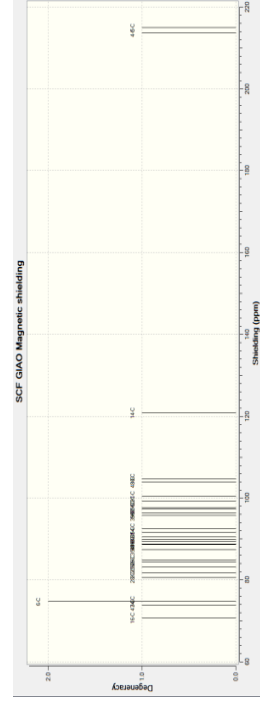

(b)



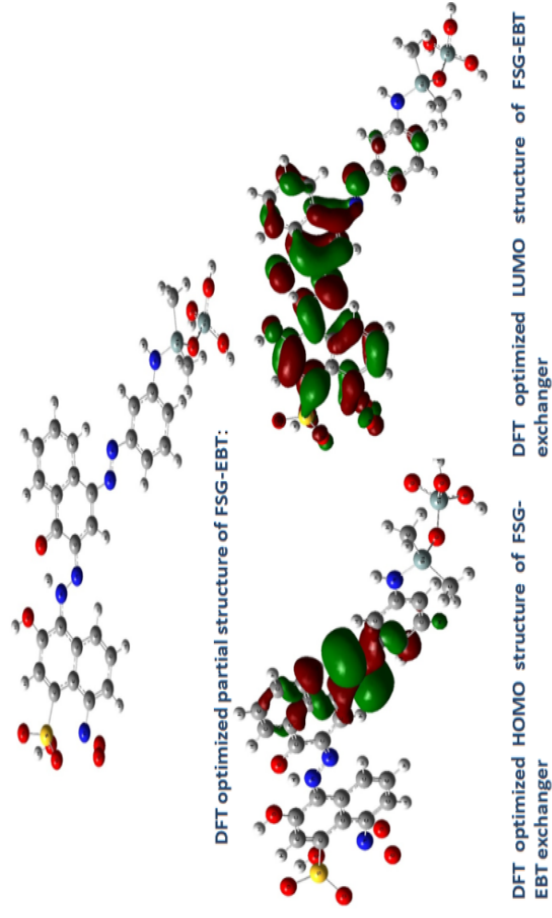

(c)

[Considering the symmetry properties of the molecule only one tetrahedral edge of FSG-EBT was taken as a model compound (Figure S2 c) to have the NMR spectra from DFT calculation. In the DFT NMR spectra (Figure S2 (a-b)) there are six pair of aromatic carbons of similar  $\delta$  (ppm) values in its  $^{13}\text{C}$  spectrum [84.8986 and 84.4461 for (C52 & C26); 74.7593 and 74.7813 for (C34 & C6); 88.6252 and 88.7531 for (C59 & C41); 97.7202 for (C57 & C15); 89.3824 and 89.8880 for (C46 & C18); 95.7599 and 96.4242 for (C39 & C56)] suggesting the shortage of 6 aromatic carbons in experimental spectra ( $^{13}\text{C}$  NMR) and clearly confirms the molecular structure



13C OF BM/FSG1

118.8  
122.20  
129.81  
131.26  
132.76

122.04


  
 13C NMR Spectrum  
 Sample: BM/FSG1  
 Date: 01/15/2004  
 Time: 14:30  
 Solvent: CDCl3  
 Concentration: 10 mg/ml  
 Temperature: 25°C  
 Acquisition: 128 K, 128 F, 128 S, 128 T, 128 U, 128 V, 128 W, 128 X, 128 Y, 128 Z  
 Processing: 128 A, 128 B, 128 C, 128 D, 128 E, 128 F, 128 G, 128 H, 128 I, 128 J, 128 K, 128 L, 128 M, 128 N, 128 O, 128 P, 128 Q, 128 R, 128 S, 128 T, 128 U, 128 V, 128 W, 128 X, 128 Y, 128 Z  
 Reference: 128 AA, 128 AB, 128 AC, 128 AD, 128 AE, 128 AF, 128 AG, 128 AH, 128 AI, 128 AJ, 128 AK, 128 AL, 128 AM, 128 AN, 128 AO, 128 AP, 128 AQ, 128 AR, 128 AS, 128 AT, 128 AU, 128 AV, 128 AW, 128 AX, 128 AY, 128 AZ  
 Integration: 128 BA, 128 BB, 128 BC, 128 BD, 128 BE, 128 BF, 128 BG, 128 BH, 128 BI, 128 BJ, 128 BK, 128 BL, 128 BM, 128 BN, 128 BO, 128 BP, 128 BQ, 128 BR, 128 BS, 128 BT, 128 BU, 128 BV, 128 BW, 128 BX, 128 BY, 128 BZ  
 Scale: 128 CA, 128 CB, 128 CC, 128 CD, 128 CE, 128 CF, 128 CG, 128 CH, 128 CI, 128 CJ, 128 CK, 128 CL, 128 CM, 128 CN, 128 CO, 128 CP, 128 CQ, 128 CR, 128 CS, 128 CT, 128 CU, 128 CV, 128 CW, 128 CX, 128 CY, 128 CZ  
 Name: 128 DA, 128 DB, 128 DC, 128 DD, 128 DE, 128 DF, 128 DG, 128 DH, 128 DI, 128 DJ, 128 DK, 128 DL, 128 DM, 128 DN, 128 DO, 128 DP, 128 DQ, 128 DR, 128 DS, 128 DT, 128 DU, 128 DV, 128 DW, 128 DX, 128 DY, 128 DZ  
 Comment: 128 EA, 128 EB, 128 EC, 128 ED, 128 EE, 128 EF, 128 EG, 128 EH, 128 EI, 128 EJ, 128 EK, 128 EL, 128 EM, 128 EN, 128 EO, 128 EP, 128 EQ, 128 ER, 128 ES, 128 ET, 128 EU, 128 EV, 128 EW, 128 EX, 128 EY, 128 EZ  
 Operator: 128 FA, 128 FB, 128 FC, 128 FD, 128 FE, 128 FF, 128 FG, 128 FH, 128 FI, 128 FJ, 128 FK, 128 FL, 128 FM, 128 FN, 128 FO, 128 FP, 128 FQ, 128 FR, 128 FS, 128 FT, 128 FU, 128 FV, 128 FW, 128 FX, 128 FY, 128 FZ  
 Instrument: 128 GA, 128 GB, 128 GC, 128 GD, 128 GE, 128 GF, 128 GG, 128 GH, 128 GI, 128 GJ, 128 GK, 128 GL, 128 GM, 128 GN, 128 GO, 128 GP, 128 GQ, 128 GR, 128 GS, 128 GT, 128 GU, 128 GV, 128 GW, 128 GX, 128 GY, 128 GZ  
 Version: 128 HA, 128 HB, 128 HC, 128 HD, 128 HE, 128 HF, 128 HG, 128 HH, 128 HI, 128 HJ, 128 HK, 128 HL, 128 HM, 128 HN, 128 HO, 128 HP, 128 HQ, 128 HR, 128 HS, 128 HT, 128 HU, 128 HV, 128 HW, 128 HX, 128 HY, 128 HZ  
 File: 128 IA, 128 IB, 128 IC, 128 ID, 128 IE, 128 IF, 128 IG, 128 IH, 128 II, 128 IJ, 128 IK, 128 IL, 128 IM, 128 IN, 128 IO, 128 IP, 128 IQ, 128 IR, 128 IS, 128 IT, 128 IU, 128 IV, 128 IW, 128 IX, 128 IY, 128 IZ  
 Path: 128 JA, 128 JB, 128 JC, 128 JD, 128 JE, 128 JF, 128 JG, 128 JH, 128 JI, 128 JJ, 128 JK, 128 JL, 128 JM, 128 JN, 128 JO, 128 JP, 128 JQ, 128 JR, 128 JS, 128 JT, 128 JU, 128 JV, 128 JW, 128 JX, 128 JY, 128 JZ  
 Folder: 128 KA, 128 KB, 128 KC, 128 KD, 128 KE, 128 KF, 128 KG, 128 KH, 128 KI, 128 KJ, 128 KK, 128 KL, 128 KM, 128 KN, 128 KO, 128 KP, 128 KQ, 128 KR, 128 KS, 128 KT, 128 KU, 128 KV, 128 KW, 128 KX, 128 KY, 128 KZ  
 Disk: 128 LA, 128 LB, 128 LC, 128 LD, 128 LE, 128 LF, 128 LG, 128 LH, 128 LI, 128 LJ, 128 LK, 128 LL, 128 LM, 128 LN, 128 LO, 128 LP, 128 LQ, 128 LR, 128 LS, 128 LT, 128 LU, 128 LV, 128 LW, 128 LX, 128 LY, 128 LZ  
 Drive: 128 MA, 128 MB, 128 MC, 128 MD, 128 ME, 128 MF, 128 MG, 128 MH, 128 MI, 128 MJ, 128 MK, 128 ML, 128 MM, 128 MN, 128 MO, 128 MP, 128 MQ, 128 MR, 128 MS, 128 MT, 128 MU, 128 MV, 128 MW, 128 MX, 128 MY, 128 MZ  
 Partition: 128 NA, 128 NB, 128 NC, 128 ND, 128 NE, 128 NF, 128 NG, 128 NH, 128 NI, 128 NJ, 128 NK, 128 NL, 128 NM, 128 NN, 128 NO, 128 NP, 128 NQ, 128 NR, 128 NS, 128 NT, 128 NU, 128 NV, 128 NW, 128 NX, 128 NY, 128 NZ  
 File Name: 128 OA, 128 OB, 128 OC, 128 OD, 128 OE, 128 OF, 128 OG, 128 OH, 128 OI, 128 OJ, 128 OK, 128 OL, 128 OM, 128 ON, 128 OO, 128 OP, 128 OQ, 128 OR, 128 OS, 128 OT, 128 OU, 128 OV, 128 OW, 128 OX, 128 OY, 128 OZ  
 File Path: 128 PA, 128 PB, 128 PC, 128 PD, 128 PE, 128 PF, 128 PG, 128 PH, 128 PI, 128 PJ, 128 PK, 128 PL, 128 PM, 128 PN, 128 PO, 128 PP, 128 PQ, 128 PR, 128 PS, 128 PT, 128 PU, 128 PV, 128 PW, 128 PX, 128 PY, 128 PZ  
 File Size: 128 QA, 128 QB, 128 QC, 128 QD, 128 QE, 128 QF, 128 QG, 128 QH, 128 QI, 128 QJ, 128 QK, 128 QL, 128 QM, 128 QN, 128 QO, 128 QP, 128 QQ, 128 QR, 128 QS, 128 QT, 128 QU, 128 QV, 128 QW, 128 QX, 128 QY, 128 QZ  
 File Type: 128 RA, 128 RB, 128 RC, 128 RD, 128 RE, 128 RF, 128 RG, 128 RH, 128 RI, 128 RJ, 128 RK, 128 RL, 128 RM, 128 RN, 128 RO, 128 RP, 128 RQ, 128 RR, 128 RS, 128 RT, 128 RU, 128 RV, 128 RW, 128 RX, 128 RY, 128 RZ  
 File Date: 128 SA, 128 SB, 128 SC, 128 SD, 128 SE, 128 SF, 128 SG, 128 SH, 128 SI, 128 SJ, 128 SK, 128 SL, 128 SM, 128 SN, 128 SO, 128 SP, 128 SQ, 128 SR, 128 SS, 128 ST, 128 SU, 128 SV, 128 SW, 128 SX, 128 SY, 128 SZ  
 File Time: 128 TA, 128 TB, 128 TC, 128 TD, 128 TE, 128 TF, 128 TG, 128 TH, 128 TI, 128 TJ, 128 TK, 128 TL, 128 TM, 128 TN, 128 TO, 128 TP, 128 TQ, 128 TR, 128 TS, 128 TT, 128 TU, 128 TV, 128 TW, 128 TX, 128 TY, 128 TZ  
 File Owner: 128 UA, 128 UB, 128 UC, 128 UD, 128 UE, 128 UF, 128 UG, 128 UH, 128 UI, 128 UJ, 128 UK, 128 UL, 128 UM, 128 UN, 128 UO, 128 UP, 128 UQ, 128 UR, 128 US, 128 UT, 128 UY, 128 UZ  
 File Group: 128 VA, 128 VB, 128 VC, 128 VD, 128 VE, 128 VF, 128 VG, 128 VH, 128 VI, 128 VJ, 128 VK, 128 VL, 128 VM, 128 VN, 128 VO, 128 VP, 128 VQ, 128 VR, 128 VS, 128 VT, 128 VU, 128 VV, 128 VW, 128 VX, 128 VY, 128 VZ  
 File Mode: 128 WA, 128 WB, 128 WC, 128 WD, 128 WE, 128 WF, 128 WG, 128 WH, 128 WI, 128 WJ, 128 WK, 128 WL, 128 WM, 128 WN, 128 WO, 128 WP, 128 WQ, 128 WR, 128 WS, 128 WT, 128 WU, 128 WV, 128 WW, 128 WX, 128 WY, 128 WZ  
 File Permissions: 128 XA, 128 XB, 128 XC, 128 XD, 128 XE, 128 XF, 128 XG, 128 XH, 128 XI, 128 XJ, 128 XK, 128 XL, 128 XM, 128 XN, 128 XO, 128 XP, 128 XQ, 128 XR, 128 XS, 128 XT, 128 XU, 128 XV, 128 XW, 128 XX, 128 XY, 128 XZ  
 File Attributes: 128 YA, 128 YB, 128 YC, 128 YD, 128 YE, 128 YF, 128 YG, 128 YH, 128 YI, 128 YJ, 128 YK, 128 YL, 128 YM, 128 YN, 128 YO, 128 YP, 128 YQ, 128 YR, 128 YS, 128 YT, 128 YU, 128 YV, 128 YW, 128 YX, 128 YY, 128 YZ  
 File Status: 128 ZA, 128 ZB, 128 ZC, 128 ZD, 128 ZE, 128 ZF, 128 ZG, 128 ZH, 128 ZI, 128 ZJ, 128 ZK, 128 ZL, 128 ZM, 128 ZN, 128 ZO, 128 ZP, 128 ZQ, 128 ZR, 128 ZS, 128 ZT, 128 ZU, 128 ZV, 128 ZW, 128 ZX, 128 ZY, 128 ZZ

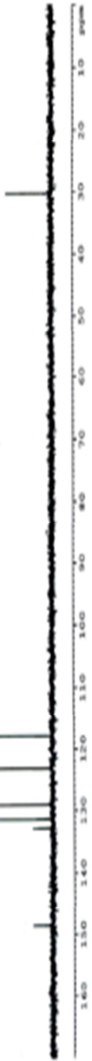

(b)



**Figure S4:** TD-DFT UV-Vis spectra of FSG-EBT

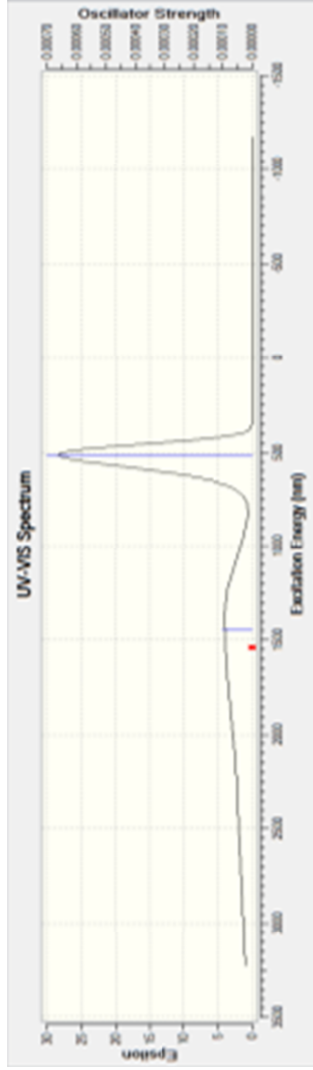

*Figure S5: (a-i) DFT optimized structures of the relevant building units of the resin*

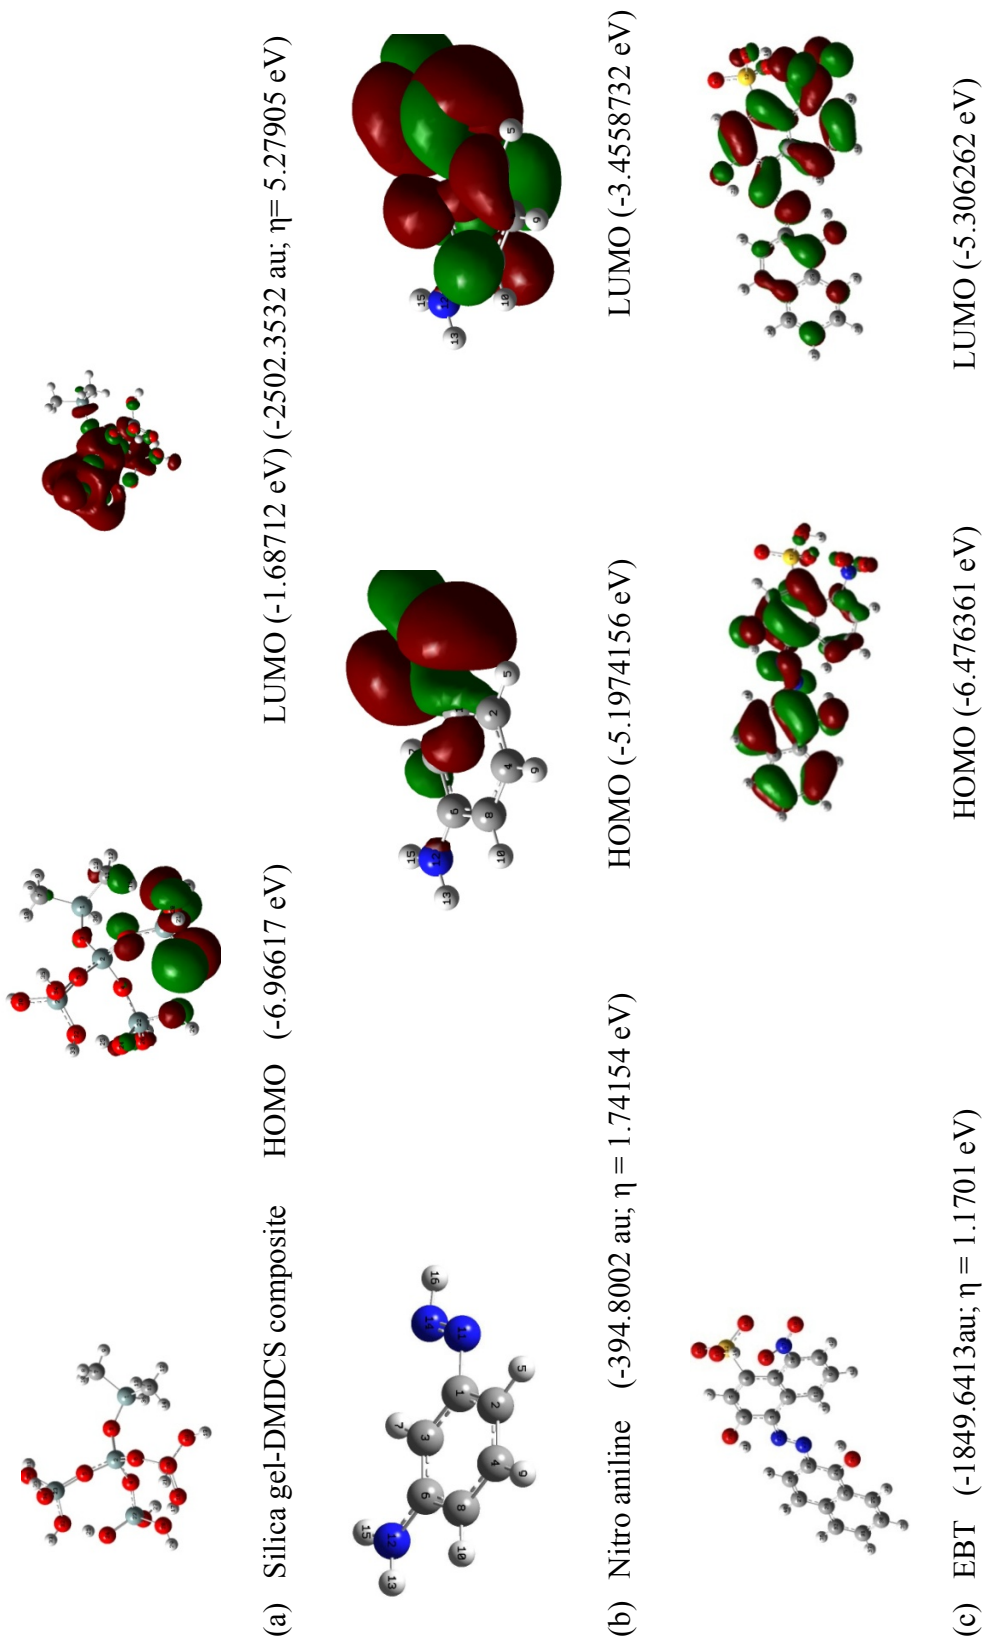

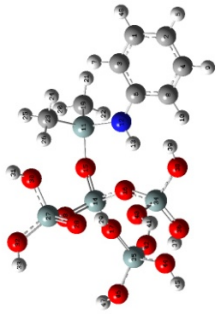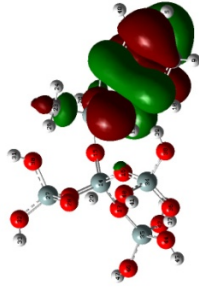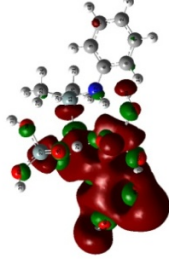

(d) SG-DMDCS-aniline (-2787.15324 au;  $\eta = 3.183757$  eV)

HOMO (-5.0885692 eV)

LUMO (-1.9048120 eV)

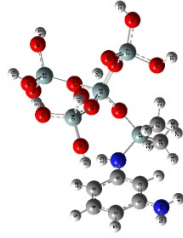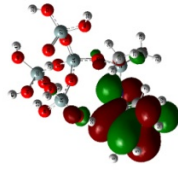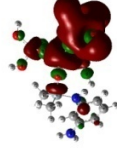

(e) Silica-DMDCS-m-aminoaniline (-2842.2366 au;  $\eta = 3.5919312$  eV)

HOMO (-5.2246272 eV)

LUMO(-1.632696 eV)

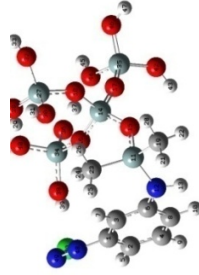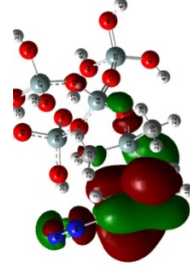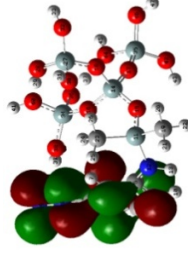

(f) Silica-DMDCS- m-aminoaniline-chloride (3354.4602 au;  $\eta = 1.98643$  eV)

HOMO (-6.1770332 eV);

LUMO (-4.1906 eV)

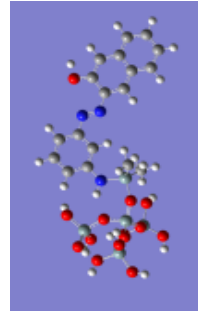

(g) Silica-m-diazonaph-aniline ( $\eta = 1.7252$  eV)

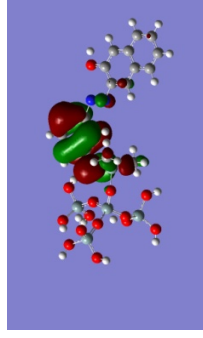

HOMO (-5.2319 eV)

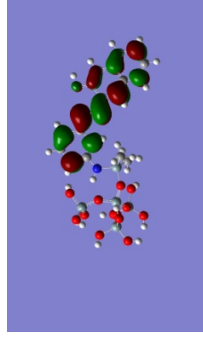

LUMO (3.5068 eV)

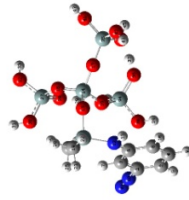

(h): Chloride salt of (g) (-3936.4161 a.u.;  $\eta = 2.5842$ )

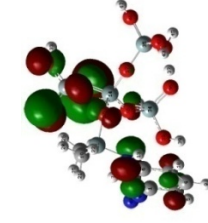

HOMO (-9.3063672 eV)

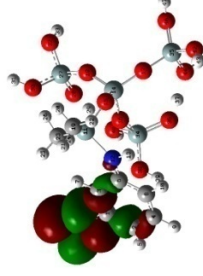

LUMO (-8.571654 eV)

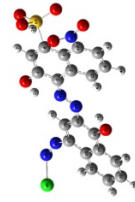

(i) EBT diazo  
(-2416.92 au; 11.06 Debye)

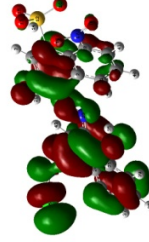

HOMO (-6.8573 eV)

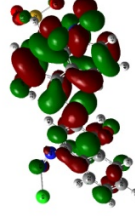

LUMO (-5.6872 eV)



[In all the building moieties viz. SG, linker (m-diazoaniline) and azo-dye (EBT) HOMO-LUMO are not well separated (Figure S5 (a-d)). However, in course of their attachment, HOMO resides at the linker site at every occasion whereas LUMO gradually shifts its position from silanized silica part to the dye component (Figure S5 (d-i)) and finally in the synthesized resin HOMO-LUMO get well separated (Figure 6a-d). Thus, both charge and hole are transferred through a 'quasi-equilibrium' [60] as per Scheme-s1, and suggests the longer life time of the ejected electron placed at the SiO<sub>2</sub> moiety. The expected charge transfer from the different components of the material produce spectral lines at the UV-Vis range (3.5919(348.0); 3.1837(392.6); 1.9864(629.3); 1.4967(835.2 nm) and 1.0701 eV (1168.1 nm)) corresponding to their HOMO-LUMO band gap (Figure S4). The experimental spectral positions (274, 366.4, 450, 578, 880.5, 950.3 and 1094.5 nm) (Figure 7a-b) are nearly compatible and support the transfer of hole by *hopping mechanism*. The privileges, thus highlighted, along with the intra-molecular charge/hole transfer can be exploited for its utility as a LED source.]

**Figure S6: Sorption isotherms:**

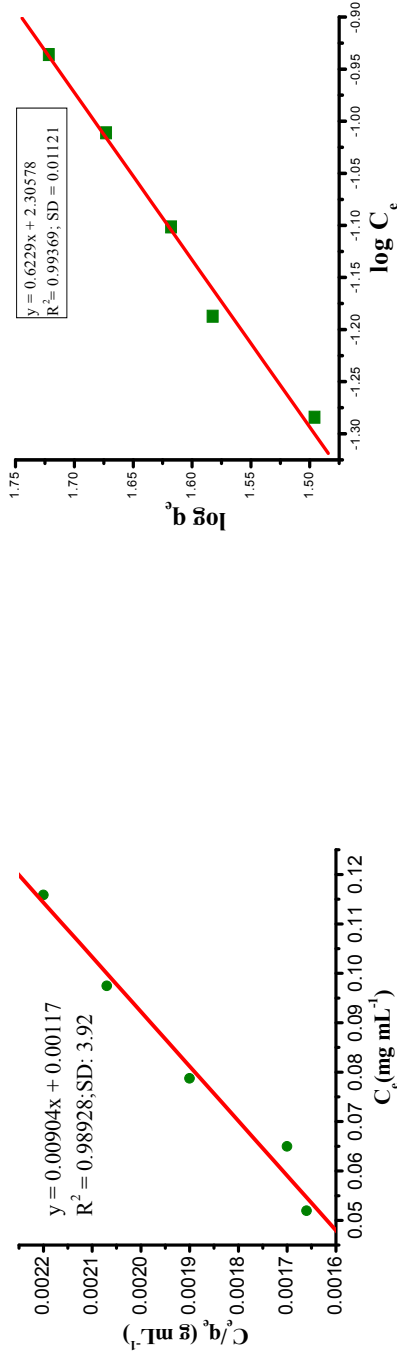

(a)

(b)

(a) Plot of  $C_e$  ( $\text{mg mL}^{-1}$ ) vs.  $\frac{C_e}{q_e}$  ( $\text{g mL}^{-1}$ ) for Langmuir isotherm (b) plot of  $\log C_e$  ( $\mu\text{mol mL}^{-1}$ ) vs.  $\log q_e$  ( $\mu\text{mol g}^{-1}$ ) for

Freundlich isotherm ( $\log q_e = \log K_F + \frac{1}{n} \log C_e$ ;  $K_F = 1.25 \times 10^2$  and  $n = 1.61$ )

**Table S2: Langmuir and Freundlich parameters**

| Langmuir parameters ; $R^2 = 0.9893$ |         |                                 |                               | Freundlich parameters; $R^2 = 0.9936$ |        |               |                    |            |        |
|--------------------------------------|---------|---------------------------------|-------------------------------|---------------------------------------|--------|---------------|--------------------|------------|--------|
| $C_e$                                | $q_e$   | $Q_0$<br>( $\text{mg g}^{-1}$ ) | $b$<br>( $\text{L mg}^{-1}$ ) | $q_{e(t)}$                            | RMSE   | $\frac{1}{n}$ | $k_F$              | $q_{e(t)}$ | RMSE   |
| <b>0.052</b>                         | 31.3253 | 110.6195                        | 7.7265                        | 31.7057                               | 0.8857 | 0.623         | $2.02 \times 10^2$ | 32.0614    | 0.9636 |
| <b>0.0650</b>                        | 38.2853 | 476.7 ( $\mu\text{M g}^{-1}$ )  |                               | 36.9822                               |        |               |                    | 36.8424    |        |
| <b>0.0788</b>                        | 41.4737 |                                 |                               | 41.8625                               |        |               |                    | 41.6635    |        |
| <b>0.0975</b>                        | 47.1015 |                                 |                               | 47.5285                               |        |               |                    | 47.4279    |        |
| <b>0.1159</b>                        | 52.6818 |                                 |                               | 52.2605                               |        |               |                    | 52.8204    |        |

**Figure S7: Elution profile of Th (IV)**

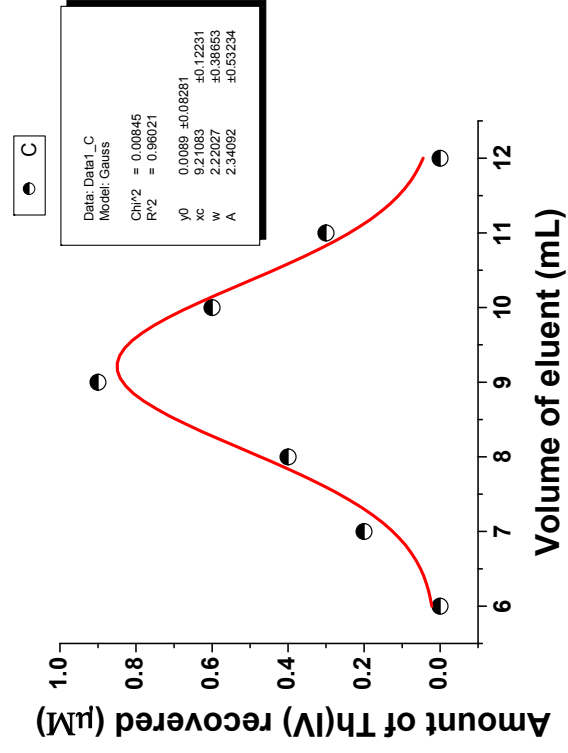

[0.5mol L<sup>-1</sup> HClO<sub>4</sub>; total volume: 5 mL; Peak height: 0.84124]

Plate number,  $N = 4 \times \left[ \frac{y^2}{x^2} \right] = 296$ ; Where,  $x = \frac{1}{2} \times w_{0.6065x/h}$  ;  $w_{0.6065x/h}$  = width at a 0.6065 times of peak height;  $y$  = distance for peak

elution.
